# Supplementary material
Source: PubMed Central journal article supplement (PMC6757157)
Supplement: jin-0010-0306-s01.pdf [file jin-0010-0306-s01.pdf]

**Supplementary Table 1.** Induced *Bom* transcript levels measured in wild-type and transgenic flies.

| Genotype                               | Induced <i>Bom</i> transcript level <sup>†</sup> |               |               |               |
|----------------------------------------|--------------------------------------------------|---------------|---------------|---------------|
|                                        | <i>Bom3</i>                                      | <i>Bom836</i> | <i>Bom065</i> | <i>Bom068</i> |
| <i>w<sup>1118</sup></i>                | 18 ± 1.1                                         | 2.8 ± .26     | 25 ± 4.0      | 3.2 ± .04     |
| <i>Bom<sup>Δ55C</sup>; {55C-Right}</i> | 19 ± .78                                         | 3.5 ± .36     | 30 ± .80      | 6.5 ± .07     |
| <i>Bom<sup>Δ55C</sup>; {Bom3}</i>      | 18 ± .84                                         | na            | na            | na            |
| <i>Bom<sup>Δ55C</sup>; {Bom836}</i>    | na                                               | 3.0 ± .34     | na            | na            |
| <i>Bom<sup>Δ55C</sup>; {Bom065}</i>    | na                                               | na            | 24 ± 1.2      | na            |
| <i>Bom<sup>Δ55C</sup>; {Bom068}</i>    | na                                               | na            | na            | 8.9 ± .48     |

<sup>†</sup>Total RNA was extracted, using Trizol, from three separate groups of flies (2-7 day old adult males, n =6) for each genotype 24 hours after Toll induction with heat-killed *M. luteus*. RNA was reverse-transcribed (SuperScript II, Invitrogen) and real-time PCR was carried out using iQ SYBR Green Supermix (Bio-Rad) with an iCycler iQ instrument. Transcript levels are shown relative to *rp49*, quantified using the 2<sup>-ΔΔCt</sup> method, and corrected for primer amplification efficiencies. Standard error of the mean is indicated. “na” = not applicable.

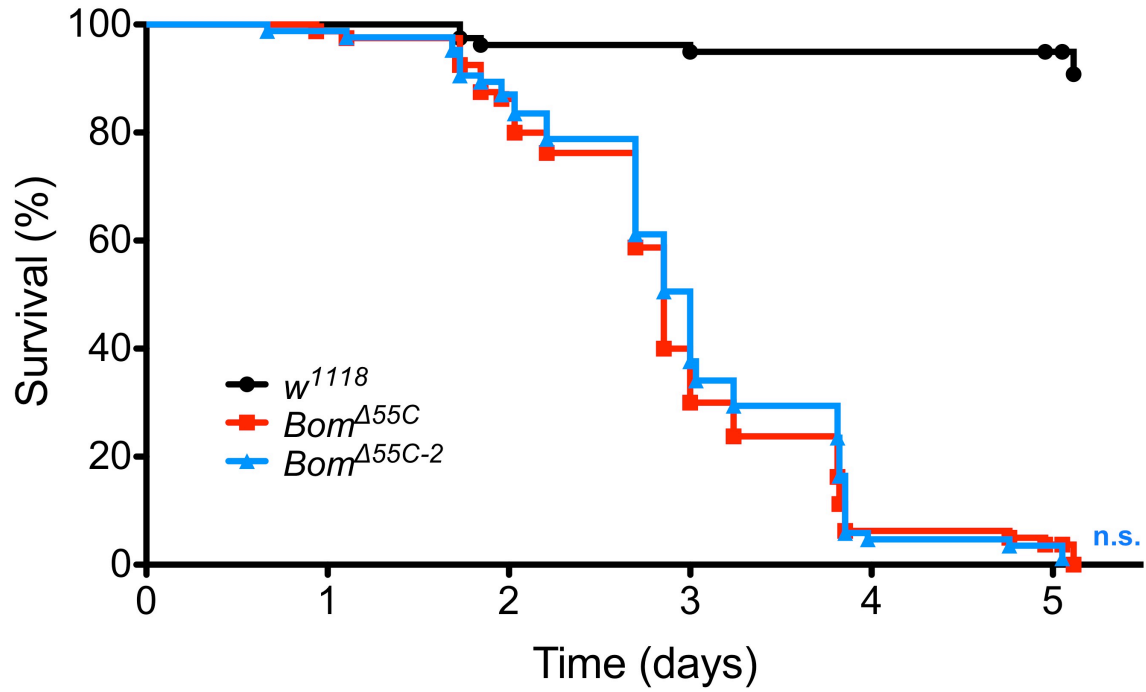

**Supplementary Figure 1.** *Bom<sup>Δ55C-2</sup>* phenocopies *Bom<sup>Δ55C</sup>*. Survival of flies after *C. glabrata* infection was monitored for wild type (*w<sup>1118</sup>*), TALEN-generated  $\Delta$ *Bom55C* (*Bom<sup>Δ55C</sup>*), and CRISPR-generated  $\Delta$ *Bom55C* (*Bom<sup>Δ55C-2</sup>*). Data were captured and analyzed as in Fig. 2. Significance is shown relative to *Bom<sup>Δ55C</sup>* (n.s. = not significant,  $p > 0.05$ ).
